# Supplementary material for: A turn-on fluorescence strategy for cellular glutathione determination based on the aggregation-induced emission enhancement of self-assembled copper nanoclusters
Source: Royal Society of Chemistry journal article supplement (doi:10.1039/d0an01247e), 2020-01-01
Supplement: d0an01247e1.pdf [file d0an01247e1.pdf]

**Electronic Supplementary Information (ESI)**  
**for**  
**A turn-on fluorescent strategy for cellular glutathione**  
**determination based on the aggregation-induced emission**  
**enhancement of self-assembly copper nanoclusters**

Hai-Bo Wang \*, An-Li Mao, Tian Gan \*, Yan-Ming Liu

*College of Chemistry and Chemical Engineering, Institute for Conservation and Utilization of Agro-bioresources in Dabie Mountains, Xinyang Normal University, Xinyang 464000, China*

---

\* Corresponding author. Tel.: +86 376 6391172; Fax: +86 376 6391172.

E-mail address: wanghaibohn@163.com (H.-B. Wang), gantianxynu@163.com (T. Gan).

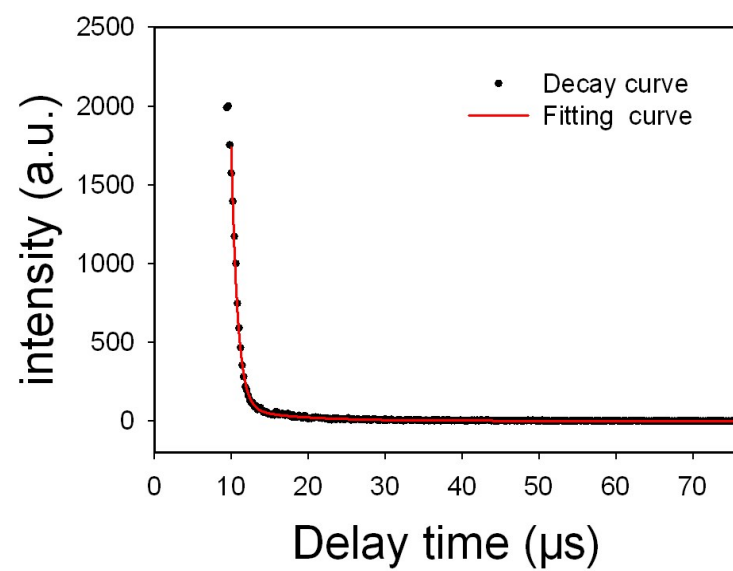

**Fig. S1.** Time-resolved decay curve of self-assembly CuNCs in water.

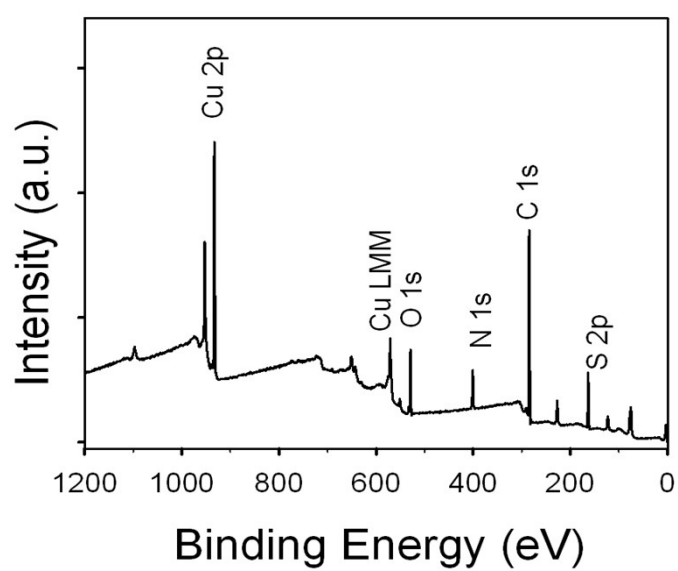

**Fig. S2.** XPS spectra of self-assembly CuNCs in the presence of GSH.

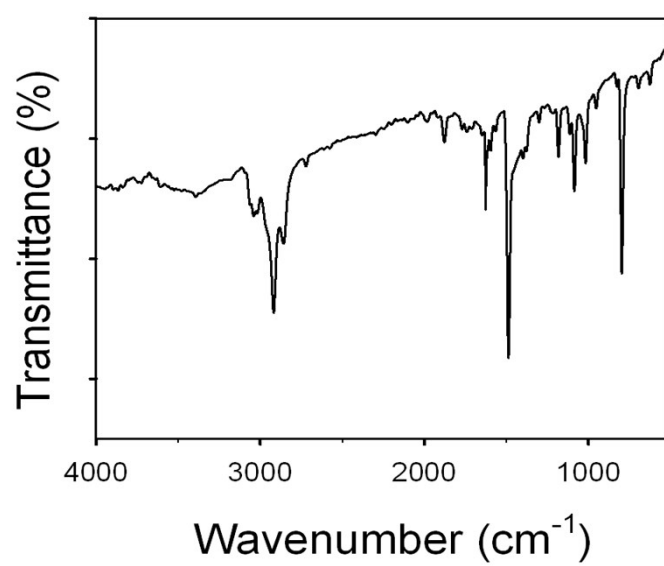

**Fig. S3.** FT-IR spectra of self-assembly CuNCs in the presence of GSH.
